# Supplementary material for: Atmospheric lifetimes, infrared absorption spectra, radiative forcings and global warming potentials of NF 3 and CF 3 CF 2 Cl (CFC-115)
Source: Copernicus journal article supplement (doi:10.5194/acp-16-11451-2016), 2016-09-14
Supplement: Supplementary file 1 [file acp-16-11451-2016-supplement.zip]

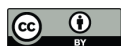

*Supplement of*

**Atmospheric lifetimes, infrared absorption spectra,  
radiative forcings and global warming potentials of  
NF<sub>3</sub> and CF<sub>3</sub>CF<sub>2</sub>Cl (CFC-115)**

**Anna Totterdill et al.**

*Correspondence to:* Piers M. Forster ([p.m.forster@leeds.ac.uk](mailto:p.m.forster@leeds.ac.uk))

- [acp-16-11451-2016-supplement-title-page.pdf](#)
- [Totterdill\\_et\\_al\\_ACP\\_NF3\\_CFC115\\_IRspectra.rtf](#)

The copyright of individual parts of the supplement might differ from the CC-BY 3.0 licence.
